1 **Navigating life with HIV as an older adult on the Kenyan coast: perceived health**  
2 **challenges seen through the biopsychosocial model**

3

4 \*Patrick N Mwangala<sup>1,2</sup>, Ryan G Wagner<sup>3</sup>, Charles R Newton<sup>1, 4,5,6</sup> Amina Abubakar<sup>1, 4 5,6</sup>

5 ***Author Affiliations:***

6 <sup>1</sup>Centre for Geographic Medicine Research Coast, Kenya Medical Research Institute (KEMRI),  
7 P.O Box 230-80108, Kilifi, Kenya

8 <sup>2</sup>School of Public Health, University of the Witwatersrand, 27 St Andrews Road, Parktown 2193,  
9 South Africa

10 <sup>3</sup>MRC/Wits Rural Public Health and Health Transitions Research Unit (Agincourt), University of  
11 the Witwatersrand, Faculty of Health Sciences, Johannesburg, South Africa

12 <sup>4</sup>Department of Psychiatry, University of Oxford, Warneford Hospital, Warneford Ln, Oxford OX3  
13 7JX, United Kingdom

14 <sup>5</sup>Department of Public Health, Pwani University, P.O. BOX 195-80108, Kilifi, Kenya

15 <sup>6</sup>Institute for Human Development, Aga Khan University, P.O. BOX 30270-00100, Nairobi,  
16 Kenya

17

18

19 \*Corresponding author: Patrick N Mwangala; Email: [pmwangala@kemri-wellcome.org](mailto:pmwangala@kemri-wellcome.org)

20 Tel: +254 708 759457

21

22

23

24

25

26

27

28

29

30

31

32

## 33 Abstract

34

35 **Background:** Kenya, like many sub-Saharan African countries (SSA), is experiencing a rise in  
36 the number of HIV infected adults aged  $\geq 50$  years (recognized as older adults living with HIV  
37 [OALWH]). This trend has created a subgroup of vulnerable older adults demanding a prompt  
38 response in research, policy, and practice to address their complex and transitioning needs.  
39 Unfortunately, little is known about the health and wellbeing of these adults in Kenya. As such,  
40 we explore the experiences of OALWH and key stakeholders at the coast of Kenya to  
41 understand the health challenges facing the OALWH.

42 **Material and methods:** We utilized the biopsychosocial model to explore views from 34  
43 OALWH and 22 stakeholders (11 health care providers and 11 primary caregivers) on the  
44 physical, mental, and psychosocial health challenges of ageing with HIV in Kilifi County, Kenya,  
45 between October and December 2019. Data were drawn from semi-structured in-depth  
46 interviews, which were audio-recorded and transcribed. A framework approach was used to  
47 synthesize the data.

48 **Results:** Symptoms of common mental disorders (e.g. stress, worry, thinking too much),  
49 comorbidities (especially ulcers/hyperacidity, hypertension, visual and memory difficulties),  
50 somatic symptoms (especially pain/body aches, fatigue, and sleep problems), financial  
51 difficulties, stigma, and discrimination were viewed as common across the participants. Suicidal  
52 ideation and substance use problems (especially '*mnazi*' – the local palm wine and '*ugoro*' –  
53 snuff) were also raised. There was an overlap of perceived risk factors across the three health  
54 domains, such as family conflicts, poverty, lack of social support, stigma, and the presence of  
55 comorbid health complaints.

56 **Conclusion:** Our findings provide a preliminary understanding of challenges, using the  
57 biopsychosocial model, facing OALWH in a low-literacy Kenyan setting. We found that OALWH  
58 at the Kenyan coast are at risk of multiple physical, mental, and psychosocial challenges, likely  
59 affecting their HIV treatment and overall health. Before programmes can have any lasting  
60 impact on these adults, improved access to basic needs, including food, financial support, and  
61 caregiving, and a reduction of stigma and discrimination must be addressed. Future research  
62 should quantify the burden of these challenges and examine the resources available to these  
63 adults before piloting and testing feasible interventions.

64

65

66

67

68

69

70

71

72

## 73 **Introduction**

74

75 The last decade has witnessed a dramatic shift in the demographic profile of people living with  
76 human immunodeficiency virus (HIV) globally. Presently, many HIV clinics are caring for a  
77 growing number of adults aged  $\geq 50$  years (categorised as older adults) due to increased  
78 survival in people living with HIV (PLWH) and a steady rise in HIV diagnoses in this age cohort  
79 (1). In High-Income Countries (HICs), more than 30% of the PLWH are now aged  $\geq 50$  years (1),  
80 and this proportion is projected to reach 70% by 2035 in certain areas, including the United  
81 States of America (USA) (2) and some parts of Europe (2, 3). Among PLWH in sub-Saharan  
82 Africa (SSA), 15% are aged  $\geq 50$  years, and this proportion is expected to double by 2040 (4). In  
83 East Africa, Kenya has an estimated HIV prevalence of 9% (for those aged 50-54 years), 8%  
84 (among those 55-59 years), and 6% (for those aged 60-64 years), compared to the national HIV  
85 prevalence of 5% (5). These statistics herald a new era in the HIV epidemic response, where  
86 the needs and demands of the OALWH can no longer be ignored, especially in Eastern and  
87 Southern Africa, home to more than half the number of OALWH globally (1). Existing evidence  
88 suggests that OALWH faces a unique set of health challenges, which may differ from those of  
89 young PLWH. In addition to physical health problems, these adults experience mental health  
90 burdens and challenges to their social wellbeing that impair their overall health (6, 7). They are  
91 especially at risk of geriatric conditions like increased frailty and reduced functional ability, which  
92 may hamper their ongoing engagement in care and treatment (6). Unfortunately, the population  
93 of OALWH continues to be underserved and marginalized in research, policy, and clinical  
94 practice, especially in SSA.

95 Research findings, mainly from HICs, indicate that OALWH present with an average of three  
96 comorbid conditions in addition to HIV, including medical diseases (e.g., diabetes,  
97 hypertension), mental health problems (e.g., depression, anxiety, substance use) and social

98 challenges (e.g., stigma, loneliness, and lack of social support) (6-9). Depression is  
99 exceptionally high among OALWH, up to five times greater than in HIV uninfected older adults  
100 (10). Anxiety, which is commonly comorbid with depression, is also said to be prevalent in this  
101 population, as high as 65%, in addition to elevated levels of current and past use of alcohol and  
102 other substances (11). Moreover, over 50% of these adults also display signs of cognitive  
103 problems, which are commonly related to other comorbidities and behavioral risk factors (6).  
104 The observed mental health challenges reduce the quality of life of these adults and have  
105 important health implications. For instance, depression and substance use remain strong  
106 predictors of poor HIV treatment outcomes and suicidal ideation (11). Untreated comorbidities  
107 commonly related to ageing, such as hypertension, may also exacerbate cognitive impairments  
108 (12). Furthermore, as PLWH grow old, the interaction of HIV, age and diabetes may elevate  
109 cognitive decline and reduce quality of life (13). The physical health problems faced by OALWH  
110 may also be complicated by environmental and psychosocial challenges such as poverty, food  
111 insecurity and lack of support (11). Though we lack a good understanding of the etiology of the  
112 physical, mental, and social impairments among OALWH, impairments appear synergistic and  
113 are driven by multiple factors, including HIV and its treatment, the ageing process, and diverse  
114 psychosocial and structural conditions in this population (6).

115 Despite the evidence of complex health challenges related to ageing and HIV, little research has  
116 qualitatively examined how OALWH understand their health and care needs. To date, most  
117 studies of ageing and HIV in SSA are cross-sectional studies focusing on biomedical processes  
118 and outcomes and rarely provide local insight into the health and wellbeing of these adults (14).  
119 Qualitative studies are needed to better understand the experiences and needs of this diverse  
120 population, especially among low-literacy populations in low resource settings. This is especially  
121 important as many cohorts of OALWH are emerging for the first time across the SSA region,  
122 and the apparent variability in findings among existing studies, e.g. in the prevalence and

123 determinants of chronic comorbidities (14). Apart from complementing quantitative studies in  
124 accurately documenting the burden and determinants of the health challenges in these adults,  
125 qualitative studies will shed light on the contextual factors to guide the development or  
126 adaptation and subsequent implementation of culturally appropriate interventions in this  
127 population. Overall, the few qualitative studies among OALWH in SSA are mainly concentrated  
128 in Uganda (15-19) and South Africa (20-24). Others are from Kenya, Eswatini and Malawi (25-  
129 28). In Uganda, ageing with HIV is seen as a daily challenge financially and socially (15-19).  
130 The key barriers to successful ageing with HIV in this setting include stigma, food insecurity,  
131 unmet healthcare needs, particularly for associated comorbidities such as common mental  
132 disorders. In South Africa, the crucial barriers to living with HIV at old age include food  
133 insecurity, unemployment, the double burden of stigma, access to transportation and healthcare  
134 (20-24).

135 In Kenya, qualitative research related to older adults has mainly explored the impact of HIV on  
136 older adults as caregivers. Emerging data suggest that OALWH in the country face complex  
137 challenges when seeking care, including visits to multiple providers to manage HIV and  
138 comorbidities, poor services in HIV clinics, ageist discrimination, inadequate social support, and  
139 poor patient-provider communication (26, 27). However, these data come from the Western  
140 region of Kenya. As such, the health and wellbeing experiences of OALWH from other parts of  
141 the country with different cultural and ethnic groups, e.g. the Kenyan coast, is not known.  
142 Nevertheless, anecdotal reports from HIV clinics in this setting indicate a rising number of  
143 OALWH and several unmet healthcare needs. To bridge this research gap, we conducted in-  
144 depth interviews to explore the health challenges faced by OALWH at Kilifi, a low literacy setting  
145 at the coast of Kenya. Using the biopsychosocial framework, we explore the perceptions of 34  
146 OALWH and 22 local stakeholders (11 healthcare providers and 11 primary caregivers) on the  
147 physical, mental, and psychosocial challenges of ageing with HIV in this setting.

148

149

## 150 **Theoretical Framework**

151

152 We utilized Engel's biopsychosocial (BPS) model of health (29), which provides a logical  
153 account of the chronic, complex, and dynamic nature of HIV. The fundamental tenet of this  
154 model for OALWH is the recognition of healthy ageing as the ability to thrive in an evolving  
155 environment influenced by physical/biological, mental/psychological, and social factors (as  
156 shown in [Figure 1](#)). The model provides a holistic approach to understanding the health needs  
157 of older adults and is supported by calls for research that positively impact the physical, mental,  
158 and social aspects of ageing with HIV (30-32). This model conceptualizes the physical,  
159 psychological, and social (both interpersonal and contextual) effects on health as dynamics.  
160 According to this model, the cause, manifestation and outcome of wellness and disease are  
161 determined by a dynamic interaction between physical, psychological, and social factors (29).  
162 Each component of the model includes systems that reciprocally influence other dynamics in the  
163 model and also affect health.

164 **Figure 1.** Components of the Biopsychosocial model of health

165

## 166 **Methods**

167

### 168 **Study context and participants**

169 This study was carried out between October and December 2019 at the Kenya Medical  
170 Research Institute-Wellcome Trust Research Programme (KWTRP) located within Kilifi County  
171 at the coast of Kenya. By the end of 2019, there were roughly 1.5 million residents in Kilifi  
172 County, the majority of whom were rural dwellers (about 60%), and 11% were aged  $\geq 50$  years

173 (33). Most Kilifi residents belong to the Mijikenda ethnic group, whose main form of livelihood is  
174 subsistence farming and small-scale trading. Close to 60% of Kilifi County residents live below  
175 the poverty line, and one-third (36%) have not attained any formal education (34). Kilifi has an  
176 HIV prevalence of 38 per 1000 people (35). Women are disproportionately more affected than  
177 men (HIV prevalence of 54 vs 23 per 1000, respectively). The HIV prevalence for older people  
178  $\geq 50$  years is unknown in this setting as it is not routinely documented during surveys. However,  
179 anecdotal reports from several HIV clinics in the study setting suggest an increasing number of  
180 older people living with HIV with unmet healthcare needs. Kilifi County is primarily served by  
181 one major public referral hospital (the Kilifi County Hospital), a few sub-county public hospitals  
182 and health centres. People living with HIV usually receive care in specialized HIV clinics within  
183 the primary facilities.

184 This study involved the following three groups of participants:

- 185 a) HIV infected older adults aged at least 50 years receiving HIV care and treatment at the  
186 HIV Comprehensive Care Clinic of the Kilifi County Hospital (KCH).
- 187 b) Healthcare providers attending to the older adults living with HIV. These included clinical  
188 officers, nursing officers, counsellors (within primary care facilities) and project  
189 managers of community-based organizations.
- 190 c) Primary caregivers of the older adults living with HIV who mostly tended to be close  
191 relatives, including spouses, children, and extended family members.

## 192 **Recruitment and eligibility**

193 Study participants were selected purposively to represent diversity in the participants'  
194 characteristics, including age, sex, residence, and the cadre of service (for healthcare  
195 providers). Initial contact was made with a community health volunteer (stationed at the Kilifi  
196 County Referral Hospital) with over ten years' experience working with PLWH at the community

197 and hospital levels. We capitalized on her experience and connections with several HIV clinics  
198 and community-based organizations around Kilifi during our recruitment process. Recruitment  
199 was conducted by a trained research assistant in liaison with the community health volunteer  
200 during their routine clinic visits. Participants expressing interest were then given more  
201 information concerning the study and how to take part. OALWH had to be  $\geq 50$  years old and on  
202 HIV treatment to be eligible. Primary caregivers were identified through the older adults living  
203 with HIV, usually during their scheduled clinic visits. These caregivers had to be directly  
204 involved in providing care and support, e.g. medical care to an older adult living with and  
205 spending time with the adult. HIV providers were approached at their place of work and invited  
206 to participate. We specifically targeted providers who provided direct care to OALWH.  
207 Participants who agreed to participate were then invited to a face-to-face interview at a  
208 convenient place, usually at KEMRI Kilifi.

## 209 **Data collection and tools**

210 The lead author (PNM) conducted in-depth interviews lasting on average 45-60 minutes with  
211 each participant. All the interviews were guided by a pre-tested semi-structured interview  
212 schedule developed with guidance from prior work on HIV and ageing. All interviews were  
213 conducted in Swahili, English or Giryama. We also sought permission from the participants to  
214 take notes and audio record the interviews. A total of 56 interviews were conducted (34 among  
215 older adults living with HIV, 11 among healthcare providers and 11 among primary caregivers).

216 Among the older adults living with HIV, topic guide themes included: patient illness experiences  
217 following diagnoses, e.g. significant mental trauma, health changes over the years and the  
218 prevailing health challenges. These issues were explored using general open-ended questions,  
219 followed by additional probing to highlight further the issue raised. For healthcare providers,  
220 participants were invited to share their experiences providing care to older adults living with HIV.  
221 Specific topic guide themes included the important health challenges observed in the older



222 adults and their preparedness to meet their needs. Among caregivers, we explored different  
223 issues, including their experiences taking care of OALWH and the challenges these adults face  
224 in their environment. We also collected respondents' demographic information such as age, sex,  
225 educational status, and employment status. For HIV infected adults, we also collected HIV-  
226 related information, including years living with HIV. All participants were given Ksh 350 (about  
227 US\$3) as compensation for time spent in the research, and transport expenses were also  
228 reimbursed.

## 229 **Data analysis**

230 All the audio-recorded interviews were transcribed verbatim by a team of four trained research  
231 assistants. Subsequent data management was done using NVivo software (version 11). We  
232 applied the framework approach to analyze our qualitative data as described by Ritchie and  
233 Spice (36). Initially, two authors (PNM and AA) developed a preliminary coding framework  
234 inductively through in-depth reading of transcripts and deductively by considering themes from  
235 the interview schedules. These codes were discussed, and consensus reached on how they  
236 should be brought together into themes with guidance from the biopsychosocial model. The  
237 initial coding framework was progressively expanded to capture emergent themes as coding  
238 continued. When the coding was complete in NVivo, the lead author grouped all themes related  
239 to a specific concept together to form categories and exported this to a word-text processor to  
240 produce charts. The generated charts were used to summarize data, look for similarities or  
241 differences and explore patterns among the three groups of participants in the analyzed data.

## 242 **Ethical considerations**

243 Written informed consent was obtained from all participants in the study. The study also  
244 obtained ethical clearance from the Kenya Medical Research Institute Scientific and Ethics  
245 Review Unit (KEMRI/SERU/CGMR-C/152/3804) and the Kilifi County Department of Health  
246 Services (HP/KCHS/VOL.X/171).

247

248

249

250

251

## 252 **Results**

253

### 254 **Sample characteristics**

255 We interviewed a total of 56 participants in this study (34 OALWH, 11 healthcare providers and  
256 11 primary caregivers). Among OALWH, 53% were women; most (82%) had up to a primary  
257 level of education, most (73%) lived in multigenerational households, and their age ranged from  
258 50 – 72 years. In addition, all the OALWH were on HIV treatment and had lived with HIV for a  
259 median duration of 12 years [10 – 15 years]. Healthcare providers included six registered  
260 nurses, two clinical officers, two project managers of community-based organizations and one  
261 HIV counsellor. All the primary caregivers were family members, the majority (73%) of whom  
262 were female. Further sociodemographic information and HIV-related characteristics of the  
263 OALWH are summarized in [Table 1](#).

264 **Table 1.** Sociodemographic and clinical characteristics of older adults living with HIV

| <b>Characteristic</b>     | <b>n (%) or median (IQR)</b> |
|---------------------------|------------------------------|
| Median age                | 57 (54 – 63)                 |
| Female                    | 18 (53%)                     |
| <b>Educational level</b>  |                              |
| None                      | 7 (20%)                      |
| Primary Level             | 21 (62%)                     |
| Secondary level           | 5 (15%)                      |
| Tertiary level            | 1 (3%)                       |
| <b>Type of employment</b> |                              |
| Unemployed/not working    | 12 (35%)                     |

|                                             |              |
|---------------------------------------------|--------------|
| Small scale trader                          | 15 (44%)     |
| Casual worker                               | 4 (12%)      |
| Professional/skilled work                   | 3 (9%)       |
| <b>Marital status</b>                       |              |
| Never married                               | 1 (3%)       |
| Married                                     | 19 (56%)     |
| Separated/Divorced                          | 7 (21%)      |
| Widowed                                     | 7 (21%)      |
| <b>Living arrangements</b>                  |              |
| Alone                                       | 5 (15%)      |
| Single generation household                 | 4 (12%)      |
| Multigenerational household                 | 25 (73%)     |
| Median household size                       | 5 (2 – 9)    |
| Residence (rural)                           | 30 (88%)     |
| Median duration since HIV diagnosis (years) | 12 (10 – 15) |
| On ART treatment                            | 34 (100%)    |
| <b>HIV status disclosure</b>                |              |
| Non-disclosure                              | 1 (3%)       |
| Partial disclosure (to close family only)   | 18 (53%)     |
| Full disclosure (beyond close family)       | 15 (44%)     |

265 **Notes: ART – Antiretroviral treatment; IQR – Interquartile Range**

266

267

## 268 **Perceived biopsychosocial challenges confronted by**

### 269 **OALWH**

270 The different forms of biopsychosocial challenges faced by OALWH are summarized in [Table 2](#).

271 Overall, most of the OALWH shared their 10-plus years of experience living with HIV, from the  
272 time of diagnosis to their current state. The majority of the OALWH described moving from a  
273 state of shock, fear, anger, denial, hopelessness, or suicidal ideations upon diagnosis to a state  
274 of acceptance and ownership. This transition would not be without challenges, as many of the  
275 OALWH noted having gone through traumatic experiences from family members, friends,  
276 workmates, and healthcare providers. These traumatic experiences, e.g. pervasive stigma (both  
277 enacted and internalized), prolonged periods of illness, spousal abandonment and separation,  
278 and financial loss, led to chronic stress and low mood. Thereafter, they narrated moving from a  
279 state of ownership to a state of constant survival characterized by an array of health problems  
280 which we have conceptualized as physical (biological), mental (psychological) and social

281 according to the biopsychosocial model. Most participants believed that older adults living with  
 282 HIV in Kilifi face an intricate mix of physical, mental, and psychosocial challenges. These  
 283 challenges are described in detail in the following sections.

284

285

286

287 **Table 2.** Perceived forms of physical, mental, and psychosocial health challenges facing older  
 288 adults living with HIV as discussed by study participants at the coast of Kenya

| Forms of health challenge                                                                                                            | Number of in-depth interviews (among OALWH) where the health challenge was discussed (N = 34)<br>n (%) | Number of in-depth interviews (among caregivers) where the health challenge was discussed (N = 11)<br>n (%) | Number of in-depth interviews (among healthcare providers) where the health challenge was discussed (N = 11)<br>n (%) |
|--------------------------------------------------------------------------------------------------------------------------------------|--------------------------------------------------------------------------------------------------------|-------------------------------------------------------------------------------------------------------------|-----------------------------------------------------------------------------------------------------------------------|
| <b>Physical complaints</b>                                                                                                           |                                                                                                        |                                                                                                             |                                                                                                                       |
| Comorbidities: chiefly ulcers/hyperacidity, hypertension, and diabetes                                                               | 29 (85%)                                                                                               | 9 (82%)                                                                                                     | 11 (100%)                                                                                                             |
| Wide-ranging physical symptoms, e.g. pain/body aches, fatigue, insomnia                                                              | 33 (97%)                                                                                               | 10 (91%)                                                                                                    | 9 (82%)                                                                                                               |
| Functional impairments, e.g. difficulties walking, writing, holding things                                                           | 18 (53%)                                                                                               | 3 (27%)                                                                                                     | 3 (27%)                                                                                                               |
| <b>Mental complaints</b>                                                                                                             |                                                                                                        |                                                                                                             |                                                                                                                       |
| Symptoms suggestive of common mental disorders, e.g. thinking too much, worry, stress, low mood, hopelessness/giving up easily       | 29 (85%)                                                                                               | 9 (82%)                                                                                                     | 9 (82%)                                                                                                               |
| Cognitive complaints chiefly memory difficulties. Others including slow mental processing/learning, attention/concentration problems | 22 (65%)                                                                                               | 7 (64%)                                                                                                     | 4 (36%)                                                                                                               |
| Current drug and substance use, mainly 'mnazi' and 'ugoro', which are the local palm wine and smokeless tobacco, respectively        | 5 (15%)                                                                                                | 0 (0%)                                                                                                      | 9 (82%)                                                                                                               |
| Suicide and suicidal ideations                                                                                                       | 3 (9%)                                                                                                 | 0 (0%)                                                                                                      | 4 (36%)                                                                                                               |
| Psychotic like symptoms, e.g. disorganized behaviour, aggression, lack of restraint and unwanted thoughts.                           | 1 (3%)                                                                                                 | 3 (27%)                                                                                                     | 3 (27%)                                                                                                               |
| <b>Psychosocial complaints</b>                                                                                                       |                                                                                                        |                                                                                                             |                                                                                                                       |
| Financial difficulties, e.g. lacking school fees for dependents, walking long distances for HIV care                                 | 31 (91%)                                                                                               | 8 (73%)                                                                                                     | 9 (82%)                                                                                                               |

|                                                                                  |                 |                |                  |
|----------------------------------------------------------------------------------|-----------------|----------------|------------------|
| HIV-related stigma and discrimination especially internalized and enacted stigma | <b>29 (85%)</b> | <b>8 (73%)</b> | <b>11 (100%)</b> |
| Ageism/ageist stereotype e.g. neglect, verbal insults, vandalism                 | <b>19 (56%)</b> | <b>5 (45%)</b> | <b>7 (64%)</b>   |
| Isolation and lack of support                                                    | <b>19 (56%)</b> | <b>5 (45%)</b> | <b>8 (73%)</b>   |
| Loneliness                                                                       | <b>17 (50%)</b> | <b>1 (9%)</b>  | <b>8 (73%)</b>   |
| Food insecurity, e.g. skipping meals or going days without food                  | <b>16 (47%)</b> | <b>5 (45%)</b> | <b>9 (82%)</b>   |

289

290

291

292

### 293 **Perceived physical health challenges**

294 Physical complaints were described to be common among adults ageing with HIV by several  
 295 participants. Key among these concerns was the onset of multiple comorbidities in these adults,  
 296 which was frequently associated with pain, loss of control of one's body, emotional distress, and  
 297 increased treatment burden (e.g. attending multiple clinics and medication burden).  
 298 Hypertension, diabetes, ulcers/hyperacidity, hearing, and visual impairments were the most  
 299 frequently reported comorbidities across the participants. Other conditions discussed (though to  
 300 a lesser extent) included obesity, arthritis, stroke, teeth problems, cervical cancer, TB, and  
 301 pneumonia. Apart from these comorbidities, somatic symptoms were also discussed in several  
 302 interviews across the groups. Pain (in the back, extremities, joints, chest, whole-body),  
 303 headaches, insomnia, fatigue or low energy, and numbness in the limbs were frequently  
 304 reported. Sometimes, these symptoms were associated with emotional distress and functional  
 305 impairments, e.g. difficulties bathing, using the phone, and performing house chores. Some  
 306 participants believed that the onset of the physical challenges was because of HIV-related  
 307 factors (e.g. HIV infection itself, long-term ART), multimorbidity, old age, food insecurity,  
 308 emotional distress, substance use, and the nature of someone's work. Participant quotes are  
 309 given in [Table 3](#).

310 **Table 3. Participants' physical health challenges quotes**

| Perceived health problem | Examples                                                                                                                                                                                                                                                                                                                                                                                                                                                                                                                                                                                                                                                                                                                  |
|--------------------------|---------------------------------------------------------------------------------------------------------------------------------------------------------------------------------------------------------------------------------------------------------------------------------------------------------------------------------------------------------------------------------------------------------------------------------------------------------------------------------------------------------------------------------------------------------------------------------------------------------------------------------------------------------------------------------------------------------------------------|
| Multiple comorbidities   | I am weak and constantly fatigued because I have ulcers, high blood pressure in addition to diabetes. My eyes are also painful and feel strained, and I sometimes experience toothache. As we are talking right now, my ears are not hearing well. So, all these diseases make me weak and significantly affect my well-being ( <b>OALWH</b> )                                                                                                                                                                                                                                                                                                                                                                            |
|                          | Ulcers is their main problem. Many of them complain of ulcers, and this is mainly because of stress. Anything small affects them. Sometimes you find one thinking too much, and another telling you, 'my children do not take care of me, they have forgotten about me', or 'I have one child.' Someone tells you about their child who died a long time ago but is still affected. Stress is a big problem because they pile up issues, not because of HIV but the other issues. Another issue is food. The elderly must look for food for themselves and their irresponsible children, who may be drunkards. Often, you find that they deal with their stress and that of their children ( <b>Healthcare Provider</b> ) |
|                          | Last year, my hands were painful, and I could not bend. I carried out an X-ray and was told it was arthritis. I was told there was no treatment, and the only relief was by massaging myself and using painkillers. So, I bought clove oil, and it is what I have been using. There are improvements, but the problem is not resolved yet. I am also unable to work and to make it worse, I have difficulties sleeping whenever I am stressed. I was recently diagnosed with high blood pressure but am not taking medications yet. I also have ulcers, but I do not usually keep it in mind ( <b>OALWH</b> )                                                                                                             |
| Somatic symptoms         | My knees are painful. Sometimes even squatting is a big challenge. I also cannot rise too quickly from a seated position; I have to support myself. I must also use painkillers for some relief before I can work. This has affected me because I cannot work without them. Whenever the analgesic effect wears out, it becomes very difficult to use my legs. I also experience headaches sometimes, and my relief is usually the painkiller. These pain killers have become my life now ( <b>OALWH</b> )                                                                                                                                                                                                                |
|                          | My pace has become very slow nowadays. I feel heavy, and there is nothing I am lifting or carrying. I often feel tired, and, in such times, I prefer walking around for some time. I must do this to ward off intrusive thoughts. Since I became diagnosed, I have also grown weak and have lost my libido. In fact, whenever I start having sex, I have this sensation of my waist being cut with a razor ( <b>OALWH</b> )                                                                                                                                                                                                                                                                                               |
|                          | My spouse cannot do heavy manual jobs. He used to work at the sea at night, which is usually cold and requires energy. It reached a point I had to stop him from going there anymore because he was weak and felt he was risking his life. Before this, he often used to complain of being sick. I was not at peace. I found it pointless for him to earn money that way and end up using it to medicate him. So I told him to stay at home and do anything else. We are living by the mercies of God ( <b>Caregiver</b> )                                                                                                                                                                                                |

311

312

### 313 **Perceived mental health challenges**

314 Participants discussed various mental health problems facing OALWH in the study setting. We  
 315 have discussed these issues under the following headings: symptoms of common mental  
 316 disorders, cognitive symptoms, substance use problems, and others (suicidal ideation and  
 317 psychotic symptoms). Notably, symptoms of common mental disorders were more frequently  
 318 discussed than the other problems. Participant quotes are given in [Table 4](#).

319 **Table 4. Mental health quotes**

| Perceived health problem         | Examples                                                                                                                                                                                                                                                                                                                                                                                                                                                                                                                                                                                                                                                                                                                                                                                                                                                                                                                                                                                                                                                                                                                                                                                                                                                                                                                                                                                                                                                                                                                                                                                                                                                                                                                                                                                                                                                                                                                                                                                                                                                                                                                                                                                                                                                                                                                                                                                                                                                                                                                                                                                                                                                                                                                                                                                                                                                                                                                                                                                                                          |
|----------------------------------|-----------------------------------------------------------------------------------------------------------------------------------------------------------------------------------------------------------------------------------------------------------------------------------------------------------------------------------------------------------------------------------------------------------------------------------------------------------------------------------------------------------------------------------------------------------------------------------------------------------------------------------------------------------------------------------------------------------------------------------------------------------------------------------------------------------------------------------------------------------------------------------------------------------------------------------------------------------------------------------------------------------------------------------------------------------------------------------------------------------------------------------------------------------------------------------------------------------------------------------------------------------------------------------------------------------------------------------------------------------------------------------------------------------------------------------------------------------------------------------------------------------------------------------------------------------------------------------------------------------------------------------------------------------------------------------------------------------------------------------------------------------------------------------------------------------------------------------------------------------------------------------------------------------------------------------------------------------------------------------------------------------------------------------------------------------------------------------------------------------------------------------------------------------------------------------------------------------------------------------------------------------------------------------------------------------------------------------------------------------------------------------------------------------------------------------------------------------------------------------------------------------------------------------------------------------------------------------------------------------------------------------------------------------------------------------------------------------------------------------------------------------------------------------------------------------------------------------------------------------------------------------------------------------------------------------------------------------------------------------------------------------------------------------|
| Signs of common mental disorders | <p>Living with HIV is difficult, my brother, because you must take medications daily without missing and must live knowing that you are sick and could die any moment. This reality makes me depressed. I also do not know who will take care of my family if I die because my relatives are of no use to me! I am jobless, and this makes me very sad and depressed because I have a family that needs to be cared for! I do not have money, getting food is a big problem, and to tell you the truth, I cannot even afford to pay school fees for my children. I must borrow to survive. As we are speaking, I have a court case because am unable to repay a loan I took (<b>OALWH</b>)</p> <p>My eyes cannot see well and are very itchy. Today in the morning, I had to compress them with hot water. The itchiness is often accompanied by coughing. I was prescribed some medications, but they were not helpful. You see this paper am holding; I cannot read anything on it unless I view it in very bright light during the day. At night, I can hardly make out the person calling my phone! This has affected me a lot. I am worried and do not know when this problem will end. Sometimes I want to work, e.g. write something, but I cannot. At night I must also depend on someone else to guide me. Other times I cannot work at all because of the eyesight problems. Whenever I am depressed, I just run to God (<b>OALWH</b>).</p> <p>My <b>parent</b> is generally stressed and very irritable. Sometimes she can get so stressed that she falls sick, forcing us to take her to the hospital (<b>Caregiver</b>).</p> <p>Sometimes, she gets very preoccupied with thoughts until she cries...not often, but it happens. Sometimes she also has trouble sleeping, and when I inquire why she tells me, 'I am always thinking, and I do not know exactly what I am thinking about, and I do not have peace.' I think she would love to be free with everyone and go anywhere she wants without people talking behind her back. She is sensitive, you know. When she hears people laughing, she usually asks me, 'why are they laughing? Are they laughing at me?' There are also times when she does not come out of her room for two or three days and must force her to eat something (<b>Caregiver</b>).</p> <p>There is this client; her skin has spots, her jaw has dropped, and looks weak when she walks. She is often in deep thoughts; for instance, we could be in a seminar where many people participate, but you find her lost in her thoughts. We had to talk to her at some point, and we realized she had been abandoned by the <b>spouse</b>. We had to do a referral for this client because of these issues (<b>Healthcare Provider</b>)</p> <p>You know these people are dealing with so many things which affect them. Stress, anxiety, depression, and that is why screening is being done, and any positive case is linked with the psychiatric clinic (<b>Healthcare Provider</b>)</p> |
| Cognitive symptoms               | <p>I can plan to do one or two things but later abandon them and do something different without any reason. For instance, I could be having a meeting, perhaps with some elders, but end up not doing and instead do other things. There is also this issue of forgetting, which is like a disease to me. I usually have a problem finding my things. Like yesterday, I could not find my money. I am worried about this problem, which is like a disease nowadays. I start doing one thing, then abandon it, and do the same to another. Sometimes my food gets burnt in the kitchen because I forget I was cooking and start doing other things. One time I decided to see a clinician about this disease because it was too much. I do not know whether it is because of these medications we are taking or something else. The clinician told me it would end with time. One thing I know, though, is that I was not like this before. This problem started when I began taking these medications. Am very surprised! I am not alone in this; my peers also complain of the same thing, many of them. Or could it be old age? (<b>OALWH</b>)</p>                                                                                                                                                                                                                                                                                                                                                                                                                                                                                                                                                                                                                                                                                                                                                                                                                                                                                                                                                                                                                                                                                                                                                                                                                                                                                                                                                                                                                                                                                                                                                                                                                                                                                                                                                                                                                                                                              |

|                                  |                                                                                                                                                                                                                                                                                                                                                                                                                                                                                                                                                                                                                                                                                                                                                                   |
|----------------------------------|-------------------------------------------------------------------------------------------------------------------------------------------------------------------------------------------------------------------------------------------------------------------------------------------------------------------------------------------------------------------------------------------------------------------------------------------------------------------------------------------------------------------------------------------------------------------------------------------------------------------------------------------------------------------------------------------------------------------------------------------------------------------|
|                                  | <p>I can place my things in one place and end up forgetting about them. This can be money or even fruits. If I do not tell my spouse that I have bought, e.g. fruits and have placed them at the cupboard, those bananas will go bad. He (my spouse) will remember, but I will not. My body also becomes numb sometimes. My hand becomes heavy and immobile, especially in the morning. This extends to the shoulders and usually makes it impossible to carry things. The hands sometimes tremble and experience prickly feeling (of pins) in addition to numbness and general weakness. One of the legs is also involved in this (<i>OALWH</i>)</p>                                                                                                             |
|                                  | <p>To speak the truth, my spouse does not concentrate nowadays. Actually, the real issue is his forgetfulness. It is a real concern for me. I have tried to make him understand that he has this challenge, but he never accepts it. I have suggested we look for medications, but he does not want to. He has also become very irritable lately. I think very few people will be able to tolerate him (<i>Caregiver</i>)</p>                                                                                                                                                                                                                                                                                                                                     |
|                                  | <p>You might explain something to one of them (<i>OALWH</i>) and moments later find that they contradict that same information. We have such cases, but not very many. Some take their ARVs and septrin/ co-trimoxazole the same way when it is not supposed to be. In fact, some interchange these drugs when they come for their refill appointments. Because of this, we usually emphasize how the drugs should be taken and give them shorter appointments, e.g. weekly, for those who stay nearby. We also ask them to come with their treatment support persons, but some say they do not have them (<i>Healthcare Provider</i>)</p>                                                                                                                        |
| <p>Substance use and suicide</p> | <p>My only addiction is to smokeless tobacco, but I stopped taking alcohol long ago. I have never smoked cigarettes before. I must use it (smokeless tobacco) every morning; otherwise, my heart will not be at peace; I will start feeling sad and not concentrate on any task. I only feel okay once I use it (<i>OALWH</i>)</p>                                                                                                                                                                                                                                                                                                                                                                                                                                |
|                                  | <p>Adults of my age in this community are ill-mannered. They like taking alcohol and smoking cigarettes. They also have extra-marital affairs. Every morning, they must have a packet of cigarettes and make sure they do not miss a bottle of the local palm wine because they cannot afford beer. They have to take a bottle or two for them to sleep well (<i>OALWH</i>)</p>                                                                                                                                                                                                                                                                                                                                                                                   |
|                                  | <p>I often feel like taking my own life. These thoughts come to me quite often, especially when I am stressed. Usually, a certain voice tells me that I am better off dead than alive, and another voice tells me not to do it. There is a fight between God and the devil. At times I wake up in the middle of the night around midnight and start thinking about many things, and this is how I lose my sleep entirely. I am just thinking, 'I do not have money, my spouse is unemployed, and my children are still in school. Where will I get food?' So in the morning, I share this with my spouse. At the church, we are also told that suicide is not the solution; it is adding the problems, so it is better to struggle but survive (<i>OALWH</i>)</p> |
|                                  | <p>Not just suicidal ideations. Sometimes we also have cases of actual suicides. Last month, an older adult committed suicide. He had recently been diagnosed with HIV, and two of his three partners also turned positive. We do not know what happened, but we received news that the old man had committed suicide two days later. So, it is a challenge (<i>Healthcare Provider</i>)</p>                                                                                                                                                                                                                                                                                                                                                                      |

320

321 ***Symptoms of common mental disorders***

322 Emotional and behavioral symptoms, suggestive of anxiety and depression, were described to  
 323 be prevalent across the participant groups. Key among these symptoms included thinking too  
 324 much (especially at night or when alone), persistent stress, low mood, anger/irritability (for no  
 325 apparent reason), worrying a lot, hopelessness, restlessness, panic attacks, and nightmares.



326 Other prominent symptoms included insomnia (difficulty falling asleep or interrupted sleep), self-  
327 isolation, low self-esteem, headaches, and low libido. Overall, these symptoms were described  
328 to be on-and-off among the OALWH and were frequently associated with the exacerbation of  
329 physical conditions (such as hypertension), chronic use of drugs (especially analgesics and  
330 sleeping pills), financial instability and overall poor quality of life. For many participants, the  
331 onset and persistence of physical body changes (e.g. peripheral neuropathy, obesity, body  
332 weakness, fatigue, pain, vision, and hearing difficulties) were considered a significant risk for the  
333 mental complaints. A few OALWH also associated their mental symptoms with evil spirits. A  
334 limited number of OALWH sought medical attention for the highlighted issues. They considered  
335 these symptoms a 'normal way of life' while many others did not know what to do or lacked the  
336 means to access any help.

### 337 ***Cognitive/neurological challenges***

338 The commonly reported complaint in this category was memory difficulty, e.g. difficulties  
339 recalling important dates or finding items (money, keys, foodstuffs). Surprisingly, most OALWH  
340 reported that they rarely forgot to take their medications as the practice had become part of their  
341 lives. Many healthcare providers corroborated this, although they also noted that there are a few  
342 OALWH at risk of poor adherence caused by cognitive impairments. For instance, some  
343 OALWH forgot to take their medications (especially those taking mnazi) while others mixed up  
344 their medications (e.g. ARV drugs and co-trimoxazole). Other cognitive symptoms included  
345 attention/concentration, processing/learning, movement, and multi-tasking difficulties. Peripheral  
346 neuropathy (manifesting as numbness or pain in the extremities and difficulty holding items) was  
347 also reported to be a common neurological problem in these adults and was associated with  
348 significant distress. Among OALWH, the cognitive symptoms were viewed as an additional  
349 disease, and many did not understand its causes. However, they bemoaned the considerable  
350 impact it had on their lives, such as pain, reduced efficiency in doing daily responsibilities (e.g.

351 reading, bathing, eating), worry and anxiety, decreased productivity and caregiver distress. The  
352 few who sought medical attention ended up being disappointed, sometimes advised that it will  
353 resolve on its own, or there is medicine, but it is costly.

### 354 ***Drugs and substance use problems***

355 Current drug and substance use was mainly discussed by healthcare providers. In contrast,  
356 most OALWH (especially men) reported having a history of drug and substance use, especially  
357 alcohol and tobacco but stopped following HIV diagnosis. However, some confessed to being  
358 social drinkers. '*Mnazi*' (the local palm wine and '*ugoro*' (smokeless tobacco or snuff) were the  
359 commonly used substances. Many providers emphasized that *mnazi* drinking is a big problem  
360 (both for men and women), noting that some OALWH came for their routine clinic appointments  
361 while drunk and sometimes forgot to take their ART drugs. Some providers also associated the  
362 *mnazi* drinking problem with unsuppressed viral loads, treatment default, sexual risk-taking  
363 behaviors, e.g. multiple partners, cross-generational sex (especially in the *mnazi* drinking dens  
364 dubbed '*mangwe*'). The key underlying factors for the increased use of *mnazi* included family  
365 conflicts which often led to stress, unstable sexual partners, negative coping skills, culture,  
366 working in a *mangwe* and the easy access of these substances (cheap and readily available).  
367 *Ugoro*, the other commonly abused substance, was especially common among women. It  
368 emerged that some of the *ugoro* users had become dependent on the substance. Beer,  
369 cigarettes, khat and bhang were also discussed, although to a lesser extent.

### 370 ***Suicidal ideation and psychotic-like symptoms***

371 Three OALWH reported having suicidal ideations, which was intermittent. This was corroborated  
372 by the healthcare providers. The commonly associated factors included persistent stress  
373 (caused mainly by financial difficulties and family conflicts), evil spirits, HIV-related (e.g. getting  
374 tired of taking ART and not getting healed). One healthcare provider reported a recent case of

375 suicide involving one polygamous man who had been diagnosed with HIV together with two of  
 376 his three wives. Though limited, there were also few reports of psychotic-like symptoms (e.g.  
 377 disorganized behaviour, aggression, lack of restraint and unwanted thoughts) across the three  
 378 groups of participants. These cases were frequently observed around the time of HIV diagnosis.  
 379 After that, the symptoms subsided, but the OALWH continued taking antipsychotics. Three  
 380 participants were reported to be on these medications in the interviews.

381  
 382 **Perceived psychosocial challenges**  
 383 Participants discussed a range of psychosocial challenges. We present these issues under the  
 384 following categories: a) financial challenges, b) stigma and discrimination, c) loneliness and  
 385 isolation. Participant quotes are given in [Table 5](#).

386 **Table 5. Participants' psychosocial challenges quotes**

| Perceived health problem | Examples                                                                                                                                                                                                                                                                                                                                                                                                                                                                                                                                                                                                                                                                                                                                                                                                                                                                                                                                                                                                                                                                                                                                                                                                                                                                                                                                                                                                                                                                                                                                                                                                                                                                                                                                                                                                                                                                                                                                                                                                                                                                                                                                                                                            |
|--------------------------|-----------------------------------------------------------------------------------------------------------------------------------------------------------------------------------------------------------------------------------------------------------------------------------------------------------------------------------------------------------------------------------------------------------------------------------------------------------------------------------------------------------------------------------------------------------------------------------------------------------------------------------------------------------------------------------------------------------------------------------------------------------------------------------------------------------------------------------------------------------------------------------------------------------------------------------------------------------------------------------------------------------------------------------------------------------------------------------------------------------------------------------------------------------------------------------------------------------------------------------------------------------------------------------------------------------------------------------------------------------------------------------------------------------------------------------------------------------------------------------------------------------------------------------------------------------------------------------------------------------------------------------------------------------------------------------------------------------------------------------------------------------------------------------------------------------------------------------------------------------------------------------------------------------------------------------------------------------------------------------------------------------------------------------------------------------------------------------------------------------------------------------------------------------------------------------------------------|
| Financial challenges     | <p data-bbox="378 1108 1537 1377">I am jobless, my brother. I have also lost my hands-on skills and experience with time. I am weak and do not have money. Getting food is a problem, and to speak the truth, even raising school fees for my children is a huge problem. Nevertheless, I have a very good friend, who is of great help to me. Sometimes, I eat at his place, lunch, and dinner, but he does not know I live with HIV. Sometimes I am depressed and anxious because I do not know how to provide for my family. My relatives are of no help to me. Like yesterday, we did not have dinner, and I had to borrow the fare to come to this place. As we speak right now, I am in debt and face a court case because I cannot repay a loan. Often, I sleep hungry and must borrow to survive (<b>OALWH</b>).</p> <p data-bbox="378 1392 1537 1591">To speak the truth, I do not receive any support from my relatives, and this is not because there are no people to help. Many of my relatives have died. I often sleep hungry. Sometimes, I only have a cup of porridge for three consecutive days...and this too is usually borrowed from a neighbor so that I can take my medications. Other times, I survive on a cup of tea or hot water. Fare is also a big challenge. However, whenever I lack fare, I usually walk to the clinic (around 50 km journey). Oftentimes, I start my journey two days ahead of my clinic appointment and have two rest points in between (<b>OALWH</b>)</p> <p data-bbox="378 1619 1537 1850">Financial challenge is a big problem for these adults because they are neglected by their children sometimes.<br/>                     The day I am on duty at the clinic, I usually give many of them fare. You will hear many saying, 'sister, please help me with fare, I walked to the clinic, and I have to walk back.' If you have a good look at them, they appear exhausted, so you end up helping them. Even food is a challenge. In our discussions, the majority say that they have one meal per day and mind you, some fail to take their medications whenever they miss a meal due to dizziness claims (<b>Healthcare Provider</b>)</p> |

|                           |                                                                                                                                                                                                                                                                                                                                                                                                                                                                                                                                                                                                                                                                                                                                                                                                                                                                                                                                                                                                                                                                                                                                                                                                                                                                                                                                                                                                                                                                                                                                                                                                                                                                                                                                                                                                                                                                                                                                                                                                                                                                                                                                                                                                                                                                                                                                                                                                                                                                                                                                                                                                                                                                                                                                                                                                                                                                                                                                                                                                                                                                                                                                                                   |
|---------------------------|-------------------------------------------------------------------------------------------------------------------------------------------------------------------------------------------------------------------------------------------------------------------------------------------------------------------------------------------------------------------------------------------------------------------------------------------------------------------------------------------------------------------------------------------------------------------------------------------------------------------------------------------------------------------------------------------------------------------------------------------------------------------------------------------------------------------------------------------------------------------------------------------------------------------------------------------------------------------------------------------------------------------------------------------------------------------------------------------------------------------------------------------------------------------------------------------------------------------------------------------------------------------------------------------------------------------------------------------------------------------------------------------------------------------------------------------------------------------------------------------------------------------------------------------------------------------------------------------------------------------------------------------------------------------------------------------------------------------------------------------------------------------------------------------------------------------------------------------------------------------------------------------------------------------------------------------------------------------------------------------------------------------------------------------------------------------------------------------------------------------------------------------------------------------------------------------------------------------------------------------------------------------------------------------------------------------------------------------------------------------------------------------------------------------------------------------------------------------------------------------------------------------------------------------------------------------------------------------------------------------------------------------------------------------------------------------------------------------------------------------------------------------------------------------------------------------------------------------------------------------------------------------------------------------------------------------------------------------------------------------------------------------------------------------------------------------------------------------------------------------------------------------------------------------|
|                           | <p>The other day, we visited an elderly client in the community, taking care of two children living with HIV. She is unemployed, and the children's <b>parent</b> is not around. The children are in school. They need support with their schooling in addition to food. She is largely unable to provide all these and often must borrow. Sometimes, you find that even the skills you are giving them, e.g. rearing chicken or fish, and making baskets, are not helpful because they are old and unable to work. In such cases, we assist them with food, counselling sessions, linkages, and referrals to foster treatment adherence and the well-being of the children (<b>Healthcare Provider</b>)</p> <p>I usually borrow money from neighbours or friends to buy food whenever my <b>parent</b> does not have. I do not mind the debt because my target is to ensure that my <b>parent</b> has food to take her medications. However, it is a bit stressful because sometimes she sleeps hungry. And this is complicated by my other <b>parent</b>, who often quarrels her with small issues, and this increases her stress. Every time my she asks for money, he says he does not have it, and if we ask him how will we survive, he replies, 'can't your child look for the money?' It is frustrating because how can I take up this responsibility when I am still in school? In fact, the one educating me is usually <b>another distant relative</b> (<b>Caregiver</b>)</p>                                                                                                                                                                                                                                                                                                                                                                                                                                                                                                                                                                                                                                                                                                                                                                                                                                                                                                                                                                                                                                                                                                                                                                                                                                                                                                                                                                                                                                                                                                                                                                                                                                                                          |
| Stigma and discrimination | <p>The elderly living with HIV undergo many challenges in the community. For instance, you find one is sick, and no one is taking care of him at home. In fact, people will avoid interacting with this person, especially where he sleeps, out of fear of contracting the virus. Some of them have called me seeking help. Sadly, when I go to their homes, I find some have not even taken a bath for a whole week! In such a case, I usually clean up the person and assist him to eat. It is sad because the family just places the food there; the person is sick and can hardly eat by himself! Some are told to stay with their HIV because they know where they took it from! As we are speaking, there is a woman I would like to talk to because she stays at <i>XX place</i> but takes her ART medications from a faraway place because she does not want relatives to know that she is living with HIV. So, HIV education has come for sure, but it is far from being complete (<b>Healthcare Provider</b>)</p> <p>She is often in low moods. Whenever she hears people talking and laughing on the other side, she gets offended. I think she would really like to be free and move about without people badmouthing her. (<b>Caregiver</b>)</p> <p>For men, there is a challenge, a huge challenge. Getting them is a very big challenge. We have tried to work with male champions to convince their fellow men to join us. Stigma is the big issue. In our meetings, you mainly find the ladies coming, and when you ask them the whereabouts of their <b>spouses</b>, they often tell you, 'He has gone to work and has sent me to listen to the messages on his behalf.' So, they have that fear; they do not want to be seen. The case is not different in the primary facilities because many of them are not coming. He either sends the <b>partner</b> or comes but is very careful not to be seen, e.g. comes in through the back. Because of this fear, you find that some of the men do not want to be tested. We have several cases where <b>one partner</b> is HIV infected; the one got tested and turned positive but is still in denial. You will find one of them saying, 'we went and got tested with him but has insisted that the machines were not functioning and as such he is not infected.' Others also note that their <b>partners</b> have constantly refused to start ART and use condoms, and whenever these issues are brought up, they end up quarrelling (<b>Healthcare Provider</b>)</p> <p>That is a big problem (stigma). Ours is a small facility, so we schedule one day in a week to see the clients living with HIV. Surprisingly, even the community knows that Tuesday is the day for those taking ARV drugs. So, most of them come very early in the morning. Therefore, I must come in very early to serve those who have stigma. Alternatively, that person will hang around the clinic from morning till evening when everyone has left so that people will not understand what she is doing there, or you will find that they will skip their appointed clinic dates (<b>Healthcare Provider</b>)</p> |

|                          |                                                                                                                                                                                                                                                                                                                                                                                                                                                                                                                                                                                                                                                                                                                                                                                                                                                                                                                                                                                                                                                                                                                                                                                                                                                                                                                                                                                                                                                                                                                                                                                                                                                                                                                                               |
|--------------------------|-----------------------------------------------------------------------------------------------------------------------------------------------------------------------------------------------------------------------------------------------------------------------------------------------------------------------------------------------------------------------------------------------------------------------------------------------------------------------------------------------------------------------------------------------------------------------------------------------------------------------------------------------------------------------------------------------------------------------------------------------------------------------------------------------------------------------------------------------------------------------------------------------------------------------------------------------------------------------------------------------------------------------------------------------------------------------------------------------------------------------------------------------------------------------------------------------------------------------------------------------------------------------------------------------------------------------------------------------------------------------------------------------------------------------------------------------------------------------------------------------------------------------------------------------------------------------------------------------------------------------------------------------------------------------------------------------------------------------------------------------|
|                          | <p>Some of them are treated very badly when they come for their appointments until I get angry myself! Let's say you are late for your appointment; you will be shouted at, insulted, and reprimanded like a child. In fact, some end up crying and I have to calm them down. It is sad because the culprits are usually the <b>healthcare providers</b> who often shout at them, saying, 'Take your drugs, or you will die of AIDS alone, and you won't see us!' It is shocking because some of them are treated very badly to the point that I am also angered. Some of them come to my desk shedding tears, so I have to calm them down. At some point, it was too much that some of them transferred to other clinics (<b>OALWH</b>)</p>                                                                                                                                                                                                                                                                                                                                                                                                                                                                                                                                                                                                                                                                                                                                                                                                                                                                                                                                                                                                  |
|                          | <p>The elderly are being burned alive and cut with pangas. As a matter of fact, some of my neighbours recently cut their <b>elderly relative</b> severally with a panga because of witchcraft accusations. Later, <b>another relative</b> also passed through the same ordeal...the head was completely slashed off with a very sharp panga! And the reason is always witchcraft; I have not heard of any other thing. Such cases are numerous where I am living. I have witnessed four elders being cut with pangas, and the sad part is that these people will never expose each other to the police...even if I know it is you who did it, I will never say it. Even when the police come, the locals will never expose the culprit (<b>OALWH</b>)</p>                                                                                                                                                                                                                                                                                                                                                                                                                                                                                                                                                                                                                                                                                                                                                                                                                                                                                                                                                                                     |
| Loneliness and isolation | <p>I really desire to have an exclusive male companion of my age to spend the rest of my life with. Having one who is already married is problematic because sometimes I am very lonely and would want to call him, but I end up avoiding it out of fear, 'what if he is with the <b>spouse</b>? And you know it is not good to break someone's marriage.' Because of such challenges, I would like to have my own man who does not belong to anyone, one I can relate to freely and love fully. You know, with someone else's <b>partner</b>, the love is incomplete, and it feels like I must hide constantly, and it reaches a point I feel afraid. Sometimes he does not pick up my calls and sends a text message saying he is at home. So, you see, with such problems, I just want to get my own man who will live with me, someone I can talk with, especially when things are difficult because it is stressful at times (<b>OALWH</b>)</p> <p>Sometimes, I wish I could have friends with whom I can confide and share my challenges, but I am afraid of being discriminated. You cannot trust anyone. I have many friends, but they are all fake (<b>OALWH</b>)</p> <p>There are times he isolates herself from other people. You might see her seated alone and in deep thoughts. Sometimes she wakes up and begins to shed tears. She usually feels that her life has come to an end, perhaps (<b>Caregiver</b>)</p> <p>Whom will I share my problems with? I do not have anyone. Anyone I open myself to will want to know how and why my <b>spouse</b> is facing those challenges. What is the cause? This will mean I start discussing and revealing the issues of my <b>spouse</b>, which is not good (<b>Caregiver</b>)</p> |

387

388 **Financial challenges**

389 This was discussed in virtually all the interviews we conducted. Many participants felt that  
 390 financial difficulty was the most crucial issue affecting OALWH in the study setting because of  
 391 its massive impact on food security, caregiving responsibilities, emotional well-being, and  
 392 management of HIV and other comorbidities. Many OALWH reported skipping meals or going  
 393 hungry for some days (sometimes up to three consecutive days), lacking school fees for their

394 dependents, and walking long distances to access HIV care (sometimes 50 kilometres) for lack  
395 of money. This was corroborated by the healthcare providers and caregivers, who further stated  
396 that many of those who slept hungry tended to skip their medications, complaining of dizziness,  
397 headaches, and stomach discomfort. To some extent, this was associated with poor treatment  
398 outcomes, including unsuppressed viral load and poor retention in care. Several factors were  
399 perceived to bring about these financial challenges, including neglect/lack of support, reduced  
400 productivity (e.g. because of physical weakness), caregiving responsibilities, cost of managing  
401 HIV and other comorbidities (e.g. attending multiple clinics) and unemployment. To make ends  
402 meet, a good number of the OALWH resorted to borrowing money from friends or taking small  
403 loans (e.g. mobile loans), which sometimes they failed to repay, leading to conflicts.

#### 404 ***Stigma and discrimination***

405 This theme incorporates HIV-related stigma and ageism (discrimination based on age). Despite  
406 relatively high levels of disclosure, a significant number of OALWH experienced HIV-related  
407 stigma. Discriminatory behaviour (enacted stigma from malicious gossip to outright  
408 discrimination, e.g. neglect, isolation, verbal insults) were reported to be common, especially in  
409 the most rural areas of the study setting. The perpetrators were mainly family members. Stigma  
410 was also reported to be common in mnazi drinking dens 'mangwe', burial ceremonies, HIV  
411 clinics and certain churches. Internalized stigma (e.g. feelings of shame, guilt) emerged as an  
412 important theme, especially among the OALWH and was frequently associated with self-  
413 isolation, anxiety or high consciousness of self, fear of seeking assistance, attending very far  
414 HIV clinics, stress, and irritability. Many participants also noted that a few community members  
415 hold negative perceptions (relatively passive but leading to acts or habits such as gossip) about  
416 OALWH, which seemed to compound the internalized stigma among OALWH. Overall, stigma  
417 was associated with physical deterioration, persistent stress, non-disclosure, reduced access to  
418 support services, and poor treatment outcomes.

419 A significant number of the participants also highlighted discrimination based on age, which was  
420 perceived in multiple settings, including the home (mainly through isolation, neglect, lack of  
421 respect from children), HIV clinic (e.g. scolded openly and verbal insults), and the community  
422 level. It also emerged that some of the community members around the study setting (especially  
423 in the most rural areas) regarded older people suspiciously. Many participants narrated hearing  
424 or witnessing several older people being beaten, beheaded, or burned alive in their houses for  
425 suspected witchcraft, and the perpetrators were mainly close family members.

### 426 ***Loneliness and isolation***

427 This emerged as an important theme in the conversations with OALWH and healthcare  
428 providers. Despite living in multigenerational households, a significant number of the OALWH  
429 expressed loneliness and isolation. Some had lost their partners, some their closest relatives  
430 and others saw their circle of friends getting smaller. Still, others felt neglected by those around  
431 them. Some decided to stick to themselves out of fear of how the people would react if they  
432 sought help, as this would mean disclosing their status. As a result, such individuals described  
433 this situation as affecting their mental health with persistent sadness and stress.

434

435

## 436 **Discussion**

437

### 438 **Summary of key findings**

439 We conducted this study to gain a preliminary understanding of the health challenges facing  
440 OALWH at the coast of Kenya. Our study provides insight into the complex challenges of ageing  
441 with HIV in the study setting. It also opens opportunities for further epidemiologic research and  
442 subsequent development of tailored interventions for this vulnerable yet understudied  
443 population. Overall, our findings reveal that OALWH in this setting are particularly vulnerable to

444 mental health problems, especially symptoms of common mental disorders, which sometimes  
445 progress to severe forms such as severe depression and suicidal ideation. They are also at risk  
446 of physical challenges, including comorbidities (especially hypertension, ulcers, and diabetes)  
447 and somatic complaints such as pain, fatigue, and insomnia. The mental and physical  
448 impairments are complicated by psychosocial challenges, including poverty, lack of support,  
449 stigma, and discrimination. Noteworthy, there was an overlap of perceived risk factors across  
450 the three health domains (e.g. family conflicts, poverty, food insecurity), suggesting that OALWH  
451 who experience these shared cumulative risk factors are more likely to face multiple health  
452 challenges. It also implies that the action taken to mitigate any or some of the shared enabling  
453 factors is likely to have a preventive spillover effect across multiple health domains. Most of the  
454 views of OALWH on health challenges were corroborated by those from the providers and  
455 caregivers. However, a few disparities emerged on some of the perceived health challenges.  
456 Current drug and substance use, for instance, was reported mainly by healthcare providers,  
457 while cognitive and somatic complaints were discussed by OALWH. By and large, our results  
458 indicate that OALWH increasingly require care that extends beyond HIV treatment, hence the  
459 urgent need to reprioritize health systems to meet their complex needs.

## 460 **Physical health challenges**

461 Our discussions clearly showed that physical challenges are important concerns for older adults  
462 living with HIV at the coast of Kenya, given their negative impacts on other health domains and  
463 overall health. The onset of multiple conditions and somatic symptoms was especially  
464 associated with pain, distress, increased treatment burden, e.g. having to attend multiple clinics  
465 reduced quality of life and functional impairment. As the number of OALWH increases in many  
466 HIV clinics, HIV care will increasingly need to draw on a wide range of medical disciplines  
467 besides evidence-based screening and monitoring protocols to ensure the healthy ageing of  
468 OALWH (3). Unfortunately, the implications of such a trend could present a significant challenge  
469 for many SSA countries, including Kenya, where older adults' care is fragmented. Most



470 healthcare providers presently lack guidance and training to identify and manage declines in  
471 physical and mental capacities in this population. The siloed provision of HIV care and other  
472 comorbidities could also imply that providers are unaware of the patients' other conditions. In  
473 the current study, many OALWH reported attending multiple clinics for different conditions,  
474 which constrained their already limited funds. Some OALWH had to choose between the ART  
475 clinic and the other clinic (e.g. hypertension and diabetes). However, some providers noted that  
476 they tried to streamline appointments among the outpatient clinics, but this was not always  
477 possible. Our findings are similar to those reported in a recent qualitative exploration of  
478 challenges with seeking HIV care services for OALWH (26). Specifically, OALWH raised unique  
479 challenges when seeking HIV care, including multiple visits to healthcare providers and poor  
480 patient-provider communication. Integration of services for HIV and non-communicable  
481 diseases in primary care may enable settings like Kenya to expand healthcare coverage for  
482 PLWH. Nonetheless, there is limited evidence of its effectiveness (37). Despite some  
483 challenges, e.g. inadequacies in structure, process and outcome, initial evidence shows that  
484 service integration can be a valuable strategy to improving health outcomes among PLWH (38).

485 The current findings also revealed a prominent intersection between ageing and HIV. For most  
486 participants, ageing rather than HIV was the primary concern. This is not surprising considering  
487 that among PLWH with controlled viraemia, HIV infection often stops being the overriding  
488 comorbidity but is simply a key element in the overall milieu of multiple conditions (39, 40). In a  
489 few instances, however, participants discussed that their experiences were associated with HIV,  
490 long-term medication use, or side effects, although their providers attributed these conditions to  
491 normal ageing. They advised the OALWH to 'wait', and they will improve with time.

492 Disagreements about the cause of a symptom or health condition may contribute to doubts  
493 about the effectiveness of treatment or conceal an emerging disease and contribute to delayed  
494 diagnoses such as medication side effects and polypharmacy. A few of the OALWH in our study

495 resorted to alternative forms of management, e.g. prayers and traditional medicine, after their  
496 conditions failed to improve following medical intervention. Overall, there is an urgent need to  
497 integrate other chronic diseases into HIV care and train staff on how best to attend to the unique  
498 needs of OALWH.

## 499 **Mental health challenges**

500 Our findings of substantial reports of common mental disorder symptoms among OALWH are  
501 consistent with previous reports of poor mental health among PLWH in the study setting, albeit  
502 among younger populations (41, 42). However, our study does not establish whether the burden  
503 among OALWH is higher or lower than that observed among young PLWH. Quantitative studies  
504 are needed to confirm this comparison. Nonetheless, OALWH may be facing a higher burden of  
505 common mental disorders than their younger counterparts for different reasons. Firstly, many of  
506 the longest surviving OALWH may be significantly impacted by the legacy of the early years of  
507 the epidemic, including multiple bereavements, 'survivor guilt' and post-traumatic stress  
508 disorder. Living for many years with an uncertain prognosis, financial challenges, and a  
509 historical and ongoing stigma may indeed contribute to a high burden of anxiety and depression  
510 in this cohort (43). Secondly, the higher burden may also be attributed to the multiple challenges  
511 that OALWH face, e.g. poverty, food insecurity, caregiving responsibility, double-stigma, and  
512 the onset of physical body changes, as evidenced in our study. Our results are also partly  
513 corroborated by findings from other settings in SSA. For instance, Charlotte and colleagues  
514 reported a high prevalence of severe depression among OALWH in West Africa, especially  
515 among those who were unemployed, current or former smokers (44). In other studies, OALWH  
516 have been noted to have lower rates of common mental disorders than uninfected age peers or  
517 younger PLWH (45). The current study did not quantify these problems, and future studies need  
518 to do so.

519 Since the beginning of the HIV epidemic, the manifestations of cognitive and neurological  
520 problems have been ubiquitous and frequently associated with poor treatment outcomes and  
521 impairment of activities of daily living (11). In our study, the most frequently reported cognitive  
522 problem was memory difficulty, which was commonly associated with stress and shame.  
523 Strikingly, healthcare providers seldom suspected cognitive impairments among OALWH and  
524 screenings were never done. This is a huge blow in detecting and managing these symptoms  
525 and contributes to the increased burden of stress and discomfort in this patient cohort. This  
526 observation is similar to what has been reported in South Africa (40, 46). Despite the reported  
527 memory challenges in this study, OALWH rarely forgot to take their medications (from their own  
528 self-reports and that of their providers). This finding is not unique in the HIV literature (47). It is  
529 possible that OALWH are more organized and experienced, and possibly more motivated after  
530 experiencing the initial devastating outcomes of the HIV pandemic. There could also be a  
531 survivor effect, where those living longer are those likely to be more adherent while those that  
532 were more forgetful were non-adherent and succumbed to AIDS. However, it is still essential to  
533 monitor the cognitive function of these adults to prevent treatment non-adherence, considering  
534 the multiple challenges they face, which are likely to impact their cognitive function.

535 Our findings also noted a section of OALWH at risk of substance use dependence, especially  
536 home-brewed alcohol (for both men and women) and smokeless tobacco (mainly women). This  
537 is not surprising given that the consumption of mnazi (the local palm wine) is known to take  
538 precedence among the inhabitants of Kilifi because it is cheap and often less regulated (48). In  
539 the current study, OALWH residing in the most interior parts (away from periurban areas), those  
540 working in mnazi drinking dens (especially older women), and those experiencing family  
541 conflicts were regarded to be most at risk of this problem. While it is true that a significant  
542 number of OALWH stop taking drugs and substances following HIV diagnosis, as noted in  
543 previous studies (ref), there are still some who abuse drugs and substances, leading to poor

544 overall health and treatment outcomes. The need to address this problem is even more crucial  
545 since it was associated with rising cases of sexual risk-taking behaviour in this cohort, including  
546 cross-generational sex, multiple sex partners and non-condom use.

## 547 **Psychosocial challenges**

548 Psychosocial factors are well-known predictors of treatment adherence, disease progression  
549 and quality of life for PLWH. Stigma and loneliness, for instance, are highly linked with mental  
550 ill-health in OALWH (49). Unlike social determinants of health (e.g. economic stability and  
551 education), psychosocial factors are considered more malleable, resulting in improved health  
552 status (8). Hence, understanding the psychosocial needs of OALWH is critical to developing  
553 interventions aimed at improving their overall health. Findings from our exploratory study  
554 suggest that financial difficulties, loneliness, stigma, and discrimination are prevalent among  
555 OALWH in the study setting and are associated with mental complaints (e.g. persistent stress)  
556 and physical health problems (e.g. worsening other conditions and poor treatment outcomes).  
557 These findings are not surprising given the prevailing situation of older adults in the country,  
558 especially those residing in rural areas. According to Help Age Kenya, the majority of older  
559 people in Kenya, especially those in rural areas, live in absolute poverty (50). Besides,  
560 individuals aged  $\geq 50$  years are the poorest age group in the country, and the majority have no  
561 formal sources of income; hence no pension to fall back on in their old age. In Western Kenya,  
562 Kiplagat and colleagues identified lack of support, HIV-related stigma, ageism, poor patient-  
563 provider communication as some of the key challenges facing OALWH when seeking HIV care  
564 services (26). In our study, although many OALWH lived in multigenerational households, very  
565 few reported receiving instrumental support. A recent report, the National Gender and Equality  
566 Commission Report, dubbed 'Whipping Wisdom', also established that older adults in Kenya  
567 faced various forms of violence, including social stigma, neglect, abandonment, and hindrance  
568 from using and disposal of property (51). Similar to our study, the drivers of such violence  
569 include land succession disputes, accusations of witchcraft, poverty and degrading family and

570 community values. Elder abuse is also recognized worldwide as a serious problem (52). The  
571 issue cannot be adequately resolved if the essential needs of older people (especially those at  
572 risk of poor health like OALWH) – for food, shelter, security and access to healthcare are not  
573 met. There is a need to create an environment where ageing is accepted as a natural part of the  
574 life cycle and where ageist stereotypes are discouraged.

## 575 **Implications**

576 Our study highlights opportunities for interventions and further research. Most importantly,  
577 interventions for this unique population must be contextualized by both age and sex. It is  
578 important to reiterate that the health challenges faced by OALWH at the coast of Kenya are  
579 often interconnected and require a cohesive and collaborative response to achieve maximum  
580 benefits. Such interventions should target modifiable factors such as emotional support and  
581 integrate needed social and community support, e.g. case management services, food and  
582 nutrition support, financial assistance with caregiving responsibilities, and transportation.  
583 Context-specific interventions to help OALWH develop and nurture their own coping strategies  
584 are also critical in this population. Patient-centred care and patient self-management principles  
585 (e.g. self-reliance and empowerment) are critical elements in chronic care and are advocated as  
586 universal strategies in international frameworks of chronic care (53). While OALWH are the  
587 primary target of most of the existing interventions in this cohort (54-56), research is required on  
588 how to build the capacity of healthcare providers, family members who act as informal  
589 caregivers and friends to provide support and care to those ageing with HIV. Future work  
590 should also examine the impacts of poverty on HIV care for OALWH as our results indicate that  
591 financial challenges influence many of these problems. Yet, it is essential to note that despite  
592 the health challenges discussed by participants, all the OALWH were currently receiving HIV  
593 care. Future research should also examine the resources and resilience among these  
594 individuals to fully understand the vital role of resilience in empowering OALWH to enact  
595 processes that buffer health from the identified stressors. There is also a need for future

596 research to quantify the existing burden of physical and mental challenges in this population in  
597 Kilifi and confirm the risk and protective factors to these challenges. Furthermore, there is an  
598 urgent need for research to pilot and test the applicability and effectiveness of interventions  
599 underlying the determinants of physical and mental impairments in this setting.

## 600 **Strengths and limitations**

601 To our knowledge, this is the first study to richly explore the health challenges of OALWH at the  
602 coast of Kenya and among the few studies in Kenya. Unlike previous studies, a key strength of  
603 this work is that participants comprised a diverse group of stakeholders, including clinicians,  
604 community-based organizations, caregivers apart from the OALWH themselves. This ensured  
605 that the views were diverse and contrasted across the different participant groups. The use of a  
606 biopsychosocial model helped us to obtain a richer insight into the complexity of the identified  
607 health challenges across the three domains in Kilifi. However, our findings emanate from a  
608 predominantly rural setting, and circumstances may differ from those in urban areas. Only  
609 OALWH who were on long-term HIV treatment were interviewed in this study; thus, their  
610 circumstances may also differ from those who are not in care or the newly diagnosed. Relatedly,  
611 there may be a survivor effect in the study population where OALWH who are most sick are  
612 unable to seek care, hence not part of the studied population. As is the norm for qualitative  
613 studies in general, data collection, analysis, and interpretation are subject to individual  
614 influences; nonetheless, we countered this effect by maintaining reflexivity and constant  
615 discussion with the research team to provide rigour and credibility to the study.

## 616 **Conclusions**

617 Our findings provide initial insight into the biopsychosocial challenges confronted by OALWH in  
618 a low-literacy Kenyan setting. The participants' views indicate that mental complaints (especially  
619 common mental disorders and memory difficulties), physical problems (particularly comorbidities  
620 and somatic symptoms) and psychosocial challenges (especially poverty, stigma, and

621 discrimination) are of concern among OALWH. Many of the perceived risk factors for these  
622 challenges often overlap across the biopsychosocial domains. Our study also highlights several  
623 opportunities for interventions and future research to tackle these issues in the study setting.  
624 Most significantly, any intervention response should be cohesive and collaborative to achieve  
625 maximum benefits and target modifiable factors and consider developing and nurturing the  
626 coping strategies of OALWH to aid self-care. Before programmes can have any impact on  
627 OALWH, improved access to basic needs, including food, financial support, and caregiving, and  
628 stigma and discrimination need to be addressed. Future research should quantify the burden of  
629 these challenges, examine the resources available to these adults, pilot, and test feasible  
630 interventions in this setting; and in doing so, aim to improve the lives of older adults living with  
631 HIV.

## 632 **Acknowledgements**

633 We would like to thank all the participants who took part in this study. We also acknowledge  
634 Irene Kasichana, Maureen Nyadzua, Haprity Mwangata, Linda Moranga and Victor Mwalewa for  
635 their role in data transcription. This work is published with the permission of the director of  
636 Kenya Medical Research Institute.

## 637 **Declaration of conflict of interests**

638 The authors declare no potential conflict of interest with respect to the research, authorship,  
639 and/or publication of this article.

## 640 **Funding**

641 This work was funded by the Wellcome Trust International Master's Fellowship to PNM (Grant  
642 number 208283/Z/17/Z). Further funding supporting this work was from 1) the Medical Research  
643 Council (Grant number MR/M025454/1) to AA. This award is jointly funded by the UK Medical  
644 Research Council (MRC) and the UK Department for International Development (DFID) under  
645 MRC/DFID concordant agreement and is also part of the EDCTP2 program supported by the

646 European Union; 2) DELTAS Africa Initiative [DEL-15-003]. The DELTAS Africa Initiative is an  
647 independent funding scheme of the African Academy of Sciences (AAS) 's Alliance for  
648 Accelerating Excellence in Science in Africa (AESA) and supported by the New Partnership for  
649 Africa's Development Planning and Coordinating Agency (NEPAD Agency) with funding from  
650 the Wellcome Trust [107769/Z/10/Z] and the UK government. The funders did not have a role in  
651 the design and conduct of the study or interpretation of study findings. The views expressed in  
652 this publication are those of the author(s) and not necessarily those of AAS, NEPAD Agency,  
653 Wellcome Trust, or the UK government. For the purpose of Open Access, the author has  
654 applied a CC-BY public copyright license to any accepted manuscript version arising from this  
655 submission.

## 656 **Data availability**

657 No additional data available. The data that support the findings of this study have been included  
658 in this article.

## 659 **References**

- 660 1. Autenrieth CS, Beck EJ, Stelzle D, Mallouris C, Mahy M, Ghys P. Global and regional trends of  
661 people living with HIV aged 50 and over: Estimates and projections for 2000–2020. *PloS one*.  
662 2018;13(11):e0207005.
- 663 2. Smit M, Cassidy R, Cozzi-Lepri A, Quiros-Roldan E, Girardi E, Mammone A, et al. Projections of  
664 non-communicable disease and health care costs among HIV-positive persons in Italy and the USA: a  
665 modelling study. *PloS one*. 2017;12(10):e0186638.
- 666 3. Smit M, Brinkman K, Geerlings S, Smit C, Thyagarajan K, van Sighem A, et al. Future challenges  
667 for clinical care of an ageing population infected with HIV: a modelling study. *The Lancet Infectious*  
668 *Diseases*. 2015;15(7):810-8.
- 669 4. Hontelez JA, de Vlas SJ, Baltussen R, Newell M-L, Bakker R, Tanser F, et al. The impact of  
670 antiretroviral treatment on the age composition of the HIV epidemic in sub-Saharan Africa. *AIDS*  
671 (London, England). 2012;26(0 1).
- 672 5. National AIDS and STI Control Programme (NASCOP). Preliminary KENPHIA 2018 Report Nairobi:  
673 NASCOP; 2020 [cited 2021 July 19]. Available from: [https://www.health.go.ke/wp-](https://www.health.go.ke/wp-content/uploads/2020/02/KENPHIA-2018-PREL-REP-2020-HR3-final.pdf)  
674 [content/uploads/2020/02/KENPHIA-2018-PREL-REP-2020-HR3-final.pdf](https://www.health.go.ke/wp-content/uploads/2020/02/KENPHIA-2018-PREL-REP-2020-HR3-final.pdf).
- 675 6. Milic J, Russwurm M, Calvino AC, Brañas F, Sánchez-Conde M, Guaraldi G. European cohorts of  
676 older HIV adults: POPPY, AGE h IV, GEPP0, COBRA and FUNCFRIL. *European Geriatric Medicine*.  
677 2019;10(2):247-57.
- 678 7. Brennan-Ing M, Ramirez-Valles J, Tax A. Aging With HIV: Health Policy and Advocacy Priorities.  
679 *Health Education & Behavior*. 2021;48(1):5-8.



- 680 8. Rubtsova AA, Kempf M-C, Taylor TN, Konkle-Parker D, Wingood GM, Holstad MM. Healthy aging  
681 in older women living with HIV infection: a systematic review of psychosocial factors. *Current HIV/AIDS*  
682 *Reports*. 2017;14(1):17-30.
- 683 9. Mwangala PN, Mabrouk A, Wagner R, Newton CR, Abubakar AA. Mental health and well-being  
684 of older adults living with HIV in sub-Saharan Africa: a systematic review. *BMJ open*.  
685 2021;11(9):e052810.
- 686 10. Brennan M, Karpiak S, Shippy R, Cantor M. *Older adults with HIV*: Nova Science Publishers, New  
687 York; 2009.
- 688 11. Brennan-Ing M. Emerging issues in HIV and aging. Sage. [https://www.sageusa.org/wp-](https://www.sageusa.org/wp-content/uploads/2020/07/emerging-issues-in-hiv-and-aging-may-2020.pdf)  
689 [content/uploads/2020/07/emerging-issues-in-hiv-and-aging-may-2020.pdf](https://www.sageusa.org/wp-content/uploads/2020/07/emerging-issues-in-hiv-and-aging-may-2020.pdf); 2020.
- 690 12. Mateen FJ, Mills EJ. Aging and HIV-related cognitive loss. *Jama*. 2012;308(4):349-50.
- 691 13. Vance DE, Fazeli PL, Dodson JE, Ackerman M, Talley M, Appel SJ. The synergistic effects of HIV,  
692 diabetes, and aging on cognition: implications for practice and research. *The Journal of neuroscience*  
693 *nursing: journal of the American Association of Neuroscience Nurses*. 2014;46(5):292.
- 694 14. Siedner MJ. Aging, health, and quality of life for older people living with HIV in Sub-Saharan  
695 Africa: a review and proposed conceptual framework. *Journal of aging and health*. 2019;31(1):109-38.
- 696 15. Kuteesa MO, Wright S, Seeley J, Mugisha J, Kinyanda E, Kakembo F, et al. Experiences of HIV-  
697 related stigma among HIV-positive older persons in Uganda—a mixed methods analysis. *SAHARA-J:*  
698 *Journal of Social Aspects of HIV/AIDS*. 2014;11(1):126-37.
- 699 16. Wright CH, Longenecker CT, Nazzindah R, Kityo C, Najjuuko T, Taylor K, et al. A Mixed Methods,  
700 Observational Investigation of Physical Activity, Exercise, and Diet Among Older Ugandans Living With  
701 and Without Chronic HIV Infection. *The Journal of the Association of Nurses in AIDS Care: JANAC*. 2020.
- 702 17. Mabisi K. *The Experiences of Older Women Living with HIV in Northern Uganda*: Miami  
703 University; 2018.
- 704 18. Schatz E, Seeley J, Negin J, Weiss HA, Tumwekwase G, Kabunga E, et al. “For us here, we remind  
705 ourselves”: strategies and barriers to ART access and adherence among older Ugandans. *BMC Public*  
706 *Health*. 2019;19(1):1-13.
- 707 19. Kuteesa MO, Seeley J, Cumming RG, Negin J. Older people living with HIV in Uganda:  
708 understanding their experience and needs. *African Journal of AIDS Research*. 2012;11(4):295-305.
- 709 20. Hlongwane N, Madiba S. Navigating life with HIV as an older adult in South African communities:  
710 A phenomenological study. *International Journal of Environmental Research and Public Health*.  
711 2020;17(16):5797.
- 712 21. Schatz E, Knight L. “I was referred from the other side”: Gender and HIV testing among older  
713 South Africans living with HIV. *PLoS One*. 2018;13(4):e0196158.
- 714 22. Knight L, Schatz E, Lewis KR, Mukumbang FC. ‘When you take pills you must eat’: Food (in)  
715 security and ART adherence among older people living with HIV. *Global public health*. 2020;15(1):97-  
716 110.
- 717 23. Knight L, Schatz E, Mukumbang FC. “I attend at Vanguard and I attend here as well”: barriers to  
718 accessing healthcare services among older South Africans with HIV and non-communicable diseases.  
719 *International journal for equity in health*. 2018;17(1):1-10.
- 720 24. Schatz E, Knight L, Mukumbang FC, Teti M, Myroniuk TW. ‘You Have to Withstand That Because  
721 You Have Come for What You Have Come for’: Barriers and facilitators to antiretroviral treatment access  
722 among older South Africans living with HIV. *Sociology of Health & Illness*. 2021.
- 723 25. Harris TG, Flören S, Mantell JE, Nkambule R, Lukhele NG, Malinga BP, et al. HIV and aging among  
724 adults aged 50 years and older on antiretroviral therapy in Eswatini. *African Journal of AIDS Research*.  
725 2021;20(1):107-15.
- 726 26. Kiplagat J, Mwangi A, Chasela C, Huschke S. Challenges with seeking HIV care services:  
727 perspectives of older adults infected with HIV in western Kenya. *BMC Public Health*. 2019;19(1):1-12.

- 728 27. Kiplagat J, Huschke S. HIV testing and counselling experiences: a qualitative study of older adults  
729 living with HIV in western Kenya. *BMC geriatrics*. 2018;18(1):1-10.
- 730 28. Freeman E. Neither 'foolish' nor 'finished': identity control among older adults with HIV in rural  
731 Malawi. *Sociology of health & illness*. 2017;39(5):711-25.
- 732 29. Engel GL. The need for a new medical model: a challenge for biomedicine. *Science*.  
733 1977;196(4286):129-36.
- 734 30. Hillman J. A call for an integrated biopsychosocial model to address fundamental disconnects in  
735 an emergent field: An introduction to the special issue on "Sexuality and Aging". *Ageing International*.  
736 2011;36(3):303-12.
- 737 31. Halkitis PN, Krause KD, Vieira DL. Mental health, psychosocial challenges and resilience in older  
738 adults living with HIV. *HIV and Aging*. 2017;42:187-203.
- 739 32. Heckman TG, Halkitis PN. *Biopsychosocial aspects of HIV and aging*. Taylor & Francis; 2014.
- 740 33. Kenya National Bureau of Statistics. The 2019 Kenya Population and Housing Census: Population  
741 by County and Sub-county: Kenya National Bureau of Statistics; 2019 [cited 2021 July 23]. Available  
742 from: [https://www.knbs.or.ke/?wpdmpro=2019-kenya-population-and-housing-census-volume-iii-](https://www.knbs.or.ke/?wpdmpro=2019-kenya-population-and-housing-census-volume-iii-distribution-of-population-by-age-sex-and-administrative-units)  
743 [distribution-of-population-by-age-sex-and-administrative-units](https://www.knbs.or.ke/?wpdmpro=2019-kenya-population-and-housing-census-volume-iii-distribution-of-population-by-age-sex-and-administrative-units).
- 744 34. Kenya National Bureau of Statistics (KNBS) and Society for International Development (SID).  
745 Exploring Kenya's inequality: pulling apart or pooling together? 2013 [cited 2021 July 23]. Available  
746 from: [http://inequalities.sidint.net/kenya/wp-](http://inequalities.sidint.net/kenya/wp-content/uploads/sites/3/2013/10/SID%20Abridged%20Small%20Version%20Final%20Download%20Report.pdf)  
747 [content/uploads/sites/3/2013/10/SID%20Abridged%20Small%20Version%20Final%20Download%20Rep](http://inequalities.sidint.net/kenya/wp-content/uploads/sites/3/2013/10/SID%20Abridged%20Small%20Version%20Final%20Download%20Report.pdf)  
748 [ort.pdf](http://inequalities.sidint.net/kenya/wp-content/uploads/sites/3/2013/10/SID%20Abridged%20Small%20Version%20Final%20Download%20Report.pdf).
- 749 35. Ministry of Health (MOH). Kenya HIV Estimates Report 2018. Nairobi: National AIDS Control  
750 Council; 2018.
- 751 36. Ritchie J, Spencer L. Qualitative data analysis for applied policy research. *Analyzing qualitative*  
752 *data*: Routledge; 2002. p. 187-208.
- 753 37. Adeyemi O, Lyons M, Njim T, Okebe J, Birungi J, Nana K, et al. Integration of non-communicable  
754 disease and HIV/AIDS management: a review of healthcare policies and plans in East Africa. *BMJ Global*  
755 *Health*. 2021;6(5):e004669.
- 756 38. Ameh S, Klipstein-Grobusch K, D'ambrosio L, Kahn K, Tollman SM, Gómez-Olivé FX. Quality of  
757 integrated chronic disease care in rural South Africa: user and provider perspectives. *Health policy and*  
758 *planning*. 2017;32(2):257-66.
- 759 39. Guaraldi G, Milic J, Mussini C. Aging with HIV. *Current HIV/AIDS Reports*. 2019;16(6):475-81.
- 760 40. Gouse H, Masson CJ, Henry M, Marcotte TD, London L, Kew G, et al. Assessing HIV provider  
761 knowledge, screening practices, and training needs for HIV-associated neurocognitive disorders. A short  
762 report. *AIDS care*. 2021;33(4):468-72.
- 763 41. Nyongesa MK, Mwangi P, Kinuthia M, Hassan AS, Koot HM, Cuijpers P, et al. Prevalence, risk and  
764 protective indicators of common mental disorders among young people living with HIV compared to  
765 their uninfected peers from the Kenyan coast: a cross-sectional study. *BMC psychiatry*. 2021;21(1):1-17.
- 766 42. Abubakar A, Van de Vijver FJ, Fischer R, Hassan AS, Gona JK, Dzombo JT, et al. 'Everyone has a  
767 secret they keep close to their hearts': challenges faced by adolescents living with HIV infection at the  
768 Kenyan coast. *BMC public health*. 2016;16(1):1-8.
- 769 43. Cahill S, Valadéz R. Growing older with HIV/AIDS: new public health challenges. *American*  
770 *journal of public health*. 2013;103(3):e7-e15.
- 771 44. Bernard C, Font H, Diallo Z, Ahonon R, Tine JM, Abouo FN, et al. Prevalence and factors  
772 associated with severe depressive symptoms in older west African people living with HIV. *BMC*  
773 *psychiatry*. 2020;20(1):1-11.

- 774 45. Nyirenda M, Chatterji S, Rochat T, Mutevedzi P, Newell M-L. Prevalence and correlates of  
775 depression among HIV-infected and-affected older people in rural South Africa. *Journal of affective*  
776 *disorders*. 2013;151(1):31-8.
- 777 46. Munsami A, Gouse H, Nightingale S, Joska JA. HIV-Associated Neurocognitive Impairment  
778 Knowledge and Current Practices: A Survey of Frontline Healthcare Workers in South Africa. *Journal of*  
779 *Community Health*. 2021;46(3):538-44.
- 780 47. Ghidei L, Simone MJ, Salow MJ, Zimmerman KM, Paquin AM, Skarf LM, et al. Aging,  
781 antiretrovirals, and adherence: a meta analysis of adherence among older HIV-infected individuals.  
782 *Drugs & aging*. 2013;30(10):809-19.
- 783 48. Ssewanyana D, Mwangala PN, Marsh V, Jao I, van Baar A, Newton CR, et al. Socio-ecological  
784 determinants of alcohol, tobacco, and drug use behavior of adolescents in Kilifi County at the Kenyan  
785 coast. *Journal of health psychology*. 2020;25(12):1940-53.
- 786 49. Grov C, Golub SA, Parsons JT, Brennan M, Karpiak SE. Loneliness and HIV-related stigma explain  
787 depression among older HIV-positive adults. *AIDS care*. 2010;22(5):630-9.
- 788 50. Help Age Kenya. Report on status and implementation of national policy on ageing in Kenya  
789 2014 [Available from:  
790 <https://www.un.org/esa/socdev/ageing/documents/workshops/Vienna/kenya.pdf>.
- 791 51. The National Gender and Equality Commission. Whipping Wisdom: Rapid assessment on  
792 violence against older persons in Kenya 2014 [Available from:  
793 <https://www.ngeckkenya.org/Downloads/Assessment-on-violence-against-older-persons-in-Kenya.pdf>.
- 794 52. Yon Y, Mikton CR, Gassoumis ZD, Wilber KH. Elder abuse prevalence in community settings: a  
795 systematic review and meta-analysis. *The Lancet Global Health*. 2017;5(2):e147-e56.
- 796 53. Thiyagarajan JA, Araujo de Carvalho I, Peña-Rosas JP, Chadha S, Mariotti SP, Dua T, et al.  
797 Redesigning care for older people to preserve physical and mental capacity: WHO guidelines on  
798 community-level interventions in integrated care. *PLoS medicine*. 2019;16(10):e1002948.
- 799 54. Negin J, Rozea A, Martiniuk AL. HIV behavioural interventions targeted towards older adults: a  
800 systematic review. *BMC Public Health*. 2014;14(1):1-10.
- 801 55. Knight L, Mukumbang FC, Schatz E. Behavioral and cognitive interventions to improve treatment  
802 adherence and access to HIV care among older adults in sub-Saharan Africa: an updated systematic  
803 review. *Systematic reviews*. 2018;7(1):1-10.
- 804 56. Bhochhibhoya A, Harrison S, Yonce S, Friedman DB, Ghimire PS, Li X. A systematic review of  
805 psychosocial interventions for older adults living with HIV. *AIDS care*. 2020:1-12.

806
